# Supplementary material for: A Structure—Activity Relationship Study of the Inhibition of α-Amylase by Benzoic Acid and Its Derivatives
Source: MDPI journal article supplement (doi:10.3390/nu14091931), 2022-05-05
Supplement: s1 [file s1]

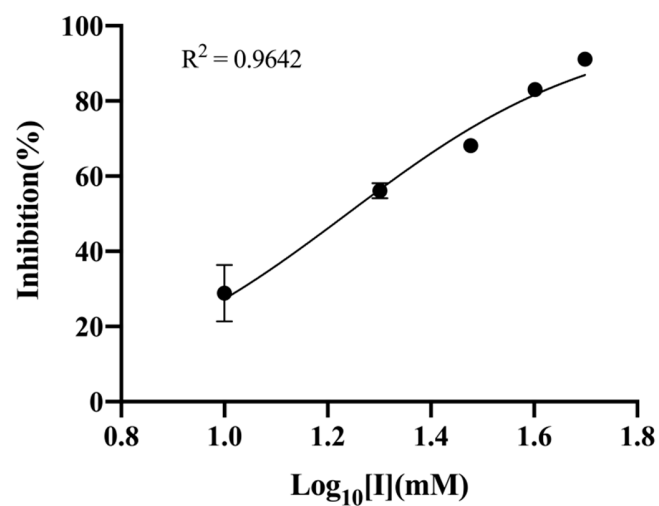

**Figure S1.** Inhibitory effect of 2,3,4-trihydroxybenzoic acid on the activity of  $\alpha$ -amylase.

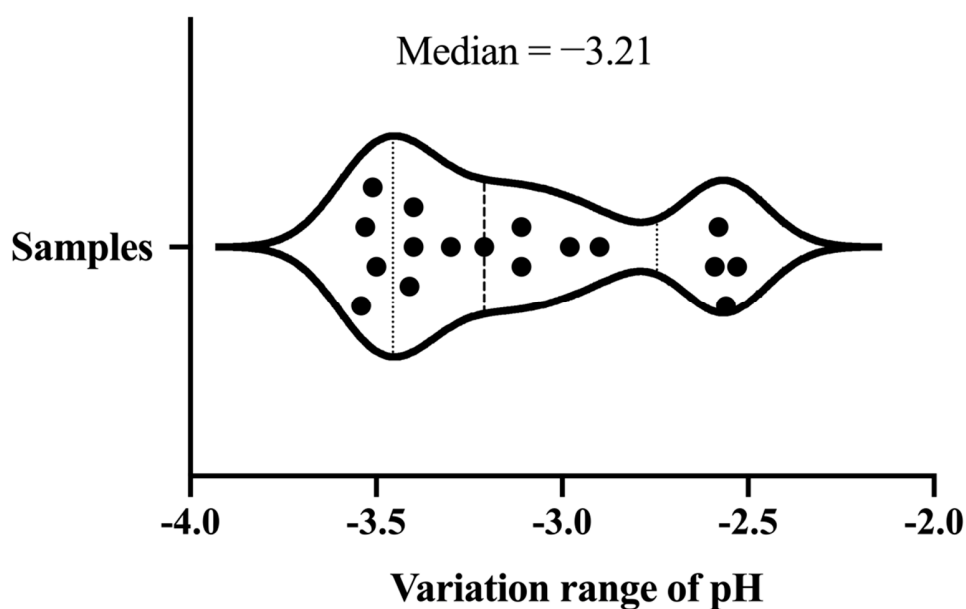

**Figure S2.** The effect of the maximum concentration of benzoic acid and its derivatives on the pH value of the reaction system before adjusting the concentration of the PBS buffer.

**Table S1.** CDOCKER Energy and CDOCKER Interaction Energy data for benzoic acid and its derivatives.

| Compound No. | Compound Name                       | CDOCKER Energy *<br>(kcal·mol <sup>-1</sup> ) | CDOCKER Interaction Energy *<br>(kcal·mol <sup>-1</sup> ) |
|--------------|-------------------------------------|-----------------------------------------------|-----------------------------------------------------------|
| 1            | Benzoic acid                        | -13.0580                                      | -15.5730                                                  |
| 2            | 4-Hydroxybenzoic acid               | -18.3349                                      | -19.0955                                                  |
| 3            | 2,4-Dihydroxybenzoic acid           | -16.5076                                      | -17.9185                                                  |
| 4            | 3,4-Dihydroxybenzoic acid           | -23.7652                                      | -19.9858                                                  |
| 5            | 2,3,4-Trihydroxybenzoic acid        | -17.7669                                      | -27.9624                                                  |
| 6            | 2,4,6-Trihydroxybenzoic acid        | -16.5577                                      | -18.5385                                                  |
| 7            | 3,4,5-Trihydroxybenzoic acid        | -22.1409                                      | -20.6498                                                  |
| 8            | 4-Methylbenzoic acid                | -16.1707                                      | -18.1230                                                  |
| 9            | 4-Hydroxy-2-methylbenzoic acid      | -20.5714                                      | -25.4675                                                  |
| 10           | 4-Hydroxy-3-methylbenzoic acid      | -19.0811                                      | -20.4046                                                  |
| 11           | 4-Hydroxy-3,5-dimethylbenzoic acid  | -21.6985                                      | -23.6935                                                  |
| 12           | 2,4-Dihydroxy-6-methylbenzoic acid  | -14.9262                                      | -18.8302                                                  |
| 13           | 4-Methoxybenzoic acid               | -15.0808                                      | -19.6385                                                  |
| 14           | 4-Hydroxy-2-methoxybenzoic acid     | -16.3666                                      | -24.9607                                                  |
| 15           | 4-Hydroxy-3-methoxybenzoic acid     | -19.6819                                      | -21.8122                                                  |
| 16           | 3,4-Dihydroxy-5-methoxybenzoic acid | -24.6296                                      | -27.9799                                                  |
| 17           | 4-Hydroxy-3,5-dimethoxybenzoic acid | -10.1005                                      | -25.4468                                                  |

\* The CDOCKER Energy and CDOCKER Interaction Energy for the top ranked binding poses of 17 phenolic acids obtained after conducting the molecular docking studies on the  $\alpha$ -amylase (PDB ID: 4W93 using the CDOCKER algorithm in the software Discovery Studio 2019, BIOVIA Inc., San Diego, CA, USA).
